# Supplementary material
Source: publisher site journal article supplement (https://www.dovepress.com/article/511982)
Supplement: Supplementary file 1 [file get_supplementary_file.php]

**Table S1**. Baseline characteristics

| **Variables** | Validation set(n=145) | | |
| --- | --- | --- | --- |
| Acceptable(n=115) | Unacceptable(n=30) | *P* value |
| Age, Median (IQR), y | 83(4) | 83(6) | 0.398 |
| Gender (male), n(%) | 71(61.74) | 17(56.67) | 0.612 |
| Height, Median (IQR), cm | 160.49(14) | 160(12.25) | 0.994 |
| Weight, Mean (SD), kg | 57.642(10.76) | 58.18(11.15) | 0.809 |
| BMI, Mean (SD), kg/m2 | 22.197(3.29) | 21.433(3.46) | 0.730 |
| ASA classification, n(%) |  |  | 0.896 |
| Ⅰ | 2(1.739) | 0(0) |  |
| Ⅱ | 68(59.13) | 17(56.67) |  |
| Ⅲ | 45(39.13) | 13(43.33) |  |
| Ⅳ | 0(0) | 0(0) |  |
| Hypertension, n(%) | 92(80) | 23(76.67) | 0.688 |
| Diabetes, n(%) | 68(59.13) | 21(70) | 0.276 |
| Coronary disease, n(%) | 6(5.22) | 1(3.33) | 1 |
| Heart disease, n(%) | 8(6.96) | 2(6.67) | 1 |
| Renal disease, n(%) | 52(45.22) | 21(70) | 0.016 |
| Cerebral apoplexy, n(%) | 8(6.96) | 3(10) | 0.698 |
| COPD, n(%) | 19(16.52) | 6(20) | 0.653 |
| History of surgery, n(%) | 53(46.09) | 14(46.67) | 0.955 |

**Notes:** IQR, interquartile rang; BMI, Body Mass Index; ASA, American Society of Anesthesiologists; COPD, Chronic Obstructive Pulmonary Disease.

**Table S2**. Perioperative data

| **Variables** | Validation set(n=576) | | |
| --- | --- | --- | --- |
| Acceptable(n=460) | Unacceptable(n=116) | *P* value |
| Laparoscope, n(%) | 74(64.35) | 18(60) | 0.660 |
| Surgical site, n(%) |  |  | 0.621 |
| Upper abdomen | 54(46.96) | 14(46.67) |  |
| Lower abdomen | 52(45.22) | 12(40) |  |
| Both | 9(7.83) | 4(13.33) |  |
| Tumor, n(%) | 371(80.65) | 104(89.66) | 0.023* |
| Operative duration, Median (IQR), min | 205(102) | 250(184) | 0.010* |
| Hospital stay, Median (IQR), d | 14(9) | 16.5(10.10) | 0.159 |
| Admission to ICU, n(%) | 10(8.70) | 6(20) | 0.101 |
| Blood transfusion, n(%) | 21(18.26) | 15(50) | ＜0.001* |
| Crystal liquid volume, Median (IQR), ml | 500(500) | 712.5(500) | 0.930 |
| Colloidal liquid volume, Median (IQR), ml | 500(0) | 500(0) | 0.774 |
| LVEF, Mean (SD), % | 63.156(6.86) | 62.546(4.95) | 0.649 |
| Total bilirubin, Median (IQR), umol/L | 11.55(6.63) | 13.1(9.92) | 0.032* |
| Indirect bilirubin, Median (IQR), μmol/L | 7.4(4.35) | 8.45(5.98) | 0.180 |
| Direct bilirubin, Median (IQR), μmol/L | 3.95(2.45) | 4.55(5.63) | 0.095 |
| ALT, Median (IQR), U/L | 13.3(11.33) | 10.65(20.80) | 0.581 |
| AST, Median (IQR), U/L | 19.2(10.13) | 20.2(16.58) | 0.264 |
| Total protein, Median (IQR), g/L | 63.8(9.40) | 63.7(7.07) | 0.531 |
| Albumin, Mean (SD), g/L | 37.544(4.63) | 35.19(3.52) | 0.011* |
| Globulin, Median (IQR), g/L | 1.4(0.30) | 1.25(0.30) | 0.003* |
| Albumin/Globulin, Mean (SD) | 26.746(5.21) | 28.172(6.90) | 0.216 |
| Urea, Median (IQR), mmol/L | 6(2.80) | 5(3.35) | 0.345 |
| Creatinine, Median (IQR), μmol/L | 70(23.80) | 74.55(35.85) | 0.671 |
| Blood glucose, Median (IQR), mmol/L | 5.06(1.53) | 4.875(1.14) | 0.738 |
| Platelet, Mean (SD), 10^9/L | 209.826(77.07) | 207.233(77.56) | 0.870 |
| Hemoglobin, Median (IQR), g/L | 130.2(3.30) | 130.7(3.75) | 0.390 |
| Leukocyte, Median (IQR), 10^9/L | 6.06(2.33) | 5.325(2.37) | 0.214 |
| Erythrocyte, Mean (SD), 10^9/L | 4.015(0.57) | 3.804(0.66) | 0.083 |
| High-sensitivity C-reactive protein, Median (IQR), mg/L | 4.98(12.80) | 10.09(11.70) | 0.042* |
| Preoperative EQ-VAS, Median (IQR) | 75(15) | 75(30) | 0.057 |
| Mobility 1/2/3/4/5 | 88/20/6/1/0 | 13/7/4/4/2 | ＜0.001* |
| Self-care 1/2/3/4/5 | 91/14/8/2/0 | 12/10/3/3/2 | ＜0.001* |
| Usual activities 1/2/3/4/5 | 96/11/4/3/1 | 16/6/2/5/1 | 0.002 |
| Pain/discomfort 1/2/3/4/5 | 11/33/58/13/0 | 1/5/15/8/1 | 0.052 |
| Anxiety/depression 1/2/3/4/5 | 35/66/12/2/0 | 9/15/3/2/1 | 0.208 |

Abbreviations: IQR, interquartile rang; SD, standard deviation; ICU, intensive care unit; LVEF, left ventricular ejection fraction; ALT, Alanine aminotransferase; AST, Aspartate aminotransferase; EQ, EuroQol; VAS, Visual Analogue Scale; 5D, 5 dimensions.

**P* < 0.05.

**Table S3.** ROC curve analysis results

| **Cut-off Value** | Training set | | | | validation set | | | |
| --- | --- | --- | --- | --- | --- | --- | --- | --- |
| **Sensitivity** | Specificity | PPV | NPV | **Sensitivity** | Specificity | PPV | NPV |
| 0.1 | 0.87 | 0.54 | 0.32 | 0.94 | 0.97 | 0.47 | 0.32 | 0.98 |
| 0.2 | 0.69 | 0.79 | 0.44 | 0.91 | 0.63 | 0.82 | 0.48 | 0.9 |
| 0.3 | 0.59 | 0.86 | 0.51 | 0.89 | 0.53 | 0.89 | 0.55 | 0.88 |
| 0.4 | 0.47 | 0.94 | 0.67 | 0.88 | 0.47 | 0.94 | 0.67 | 0.87 |
| 0.5 | 0.36 | 0.96 | 0.7 | 0.86 | 0.4 | 0.97 | 0.75 | 0.86 |
| 0.6 | 0.22 | 0.97 | 0.67 | 0.83 | 0.3 | 0.98 | 0.82 | 0.84 |

**Notes:** PPV, p**ositive predictive value**; NPV, **negative predictive value**.
